# Supplementary material for: Prognostic characterization of the pyroptosis-related subtypes and tumor microenvironment infiltration in glioma
Source: Research Square preprint supplement (doi:10.21203/rs.3.rs-1212592/v1), 2021-12-29
Supplement: Supplementary file 1 [file 67c393992a28e5cb5ecd6e5e.docx]

**Supplementary Figures**


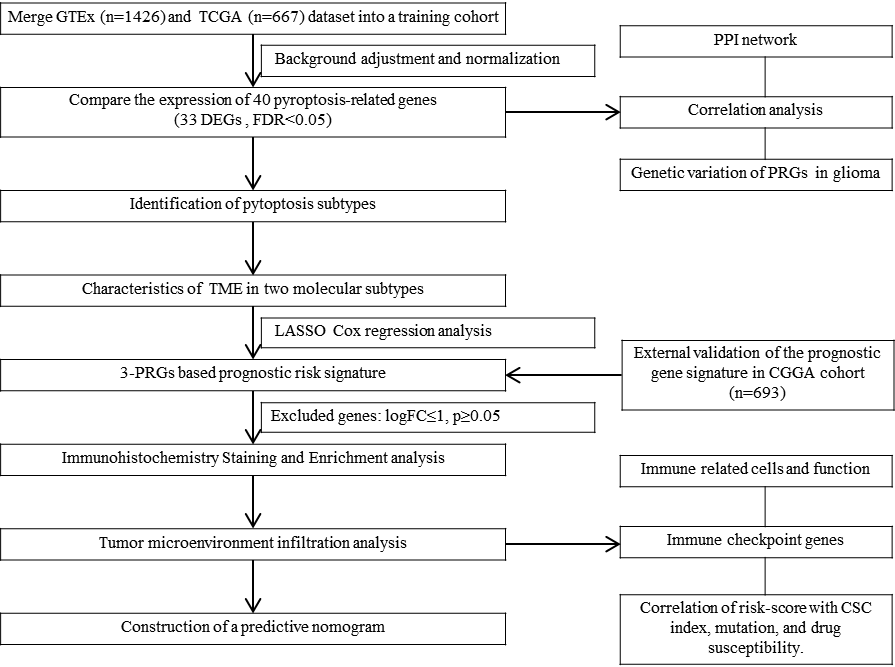


**Figure S1** The workflow chart about each analytical process of the study.


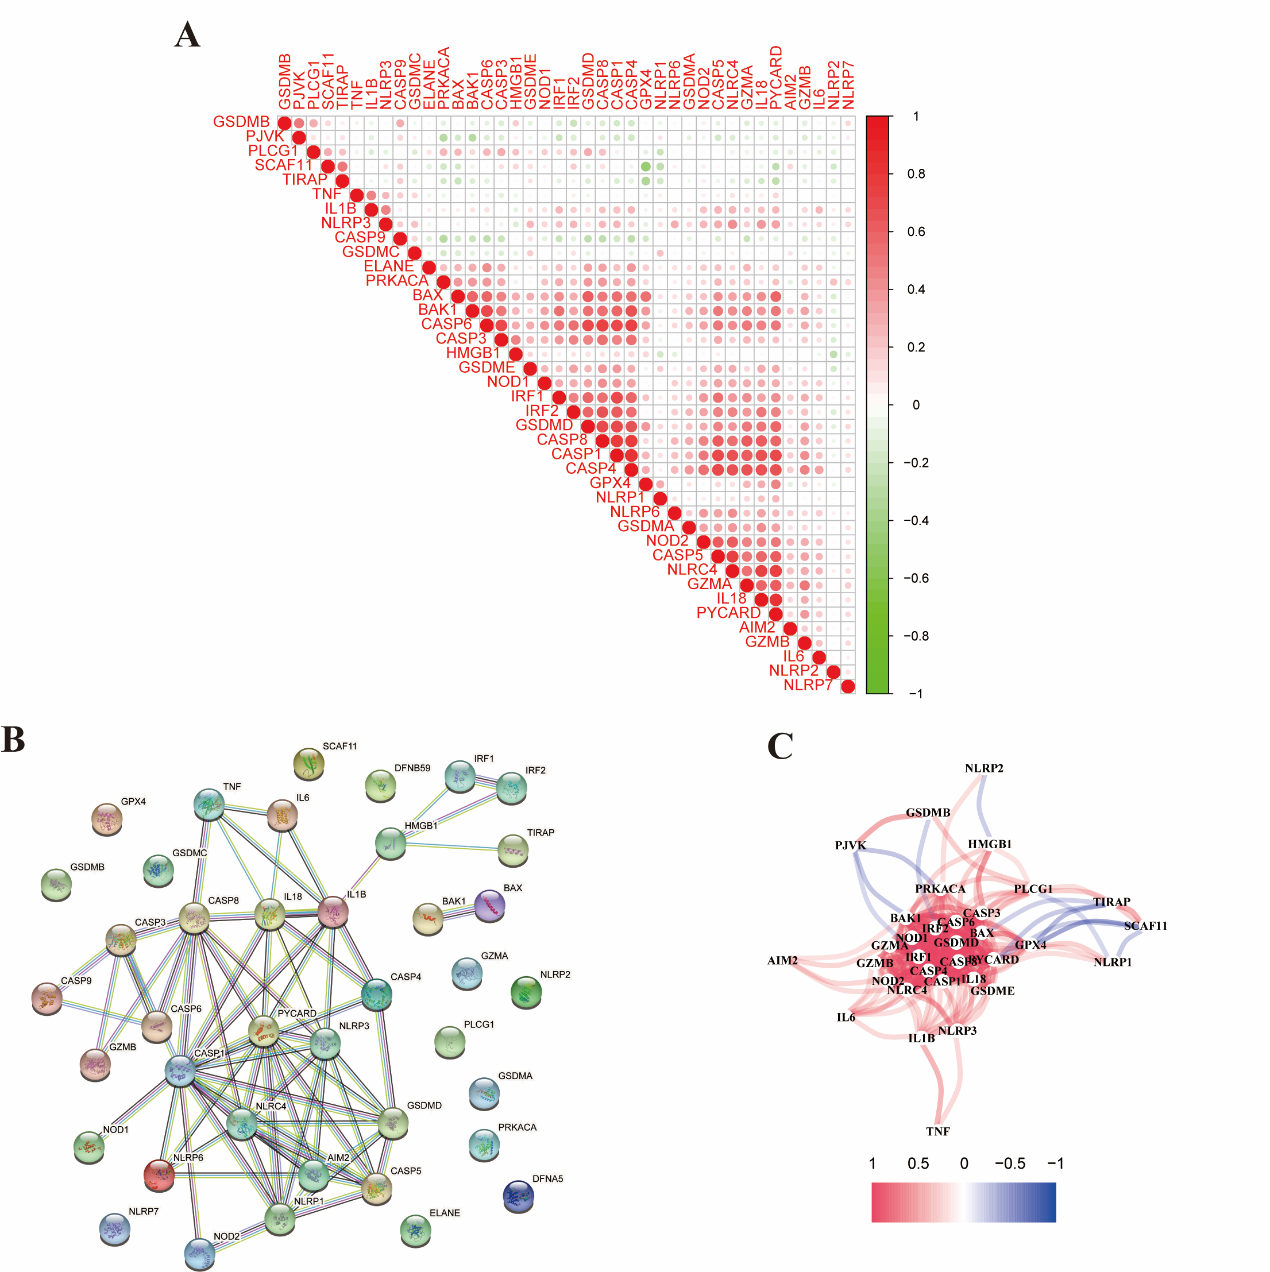


**FIGURE S2** Correlation networks of pyroptosis-related genes in gliomas and their potential interactions. (**A**) Correlations between 40 pyroptosis-related genes. The stronger the correlation, the darker the color. (**B**) The interactions of the 33 DEGs in the PPI network (interaction confidence score = 0.9). (**C**) The correlation network of the 33 DEGs (red line: positive correlation; blue line: negative correlation).
